# Supplementary material
Source: publisher figshare collection journal article supplement (https://asha.figshare.com/articles/dataset/_/6170333)
Supplement: Supplementary file 1 [file 1]

## **Supplemental Appendix B.** Word pairs.

Training Trials      dry – wet

fat – thin

Test Trials          awake – asleep

clean – dirty

happy – sad

old – young

small – big

tall – short

*Note:* The first item of each pair is the image selected by the experimenter.
