# Supplementary material
Source: publisher figshare collection journal article supplement (https://asha.figshare.com/articles/dataset/_/6170333)
Supplement: Supplementary file 2 [file 1]

**Supplemental Appendix A.** Visual stimuli for the opposite task.

dry dog – wet dog – thin dog

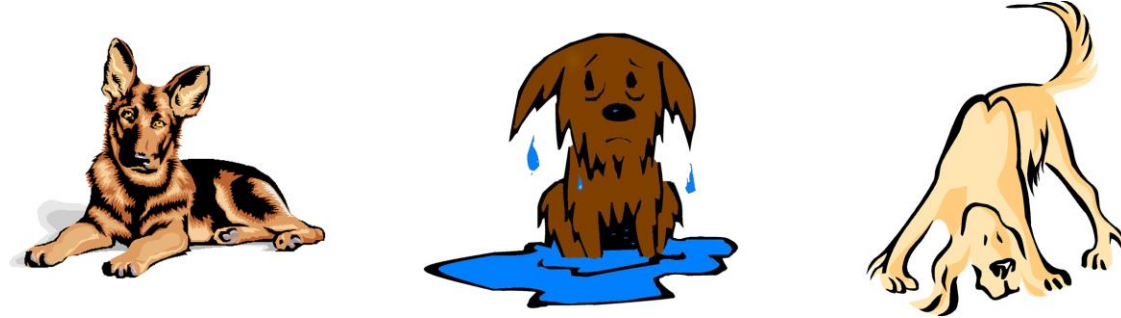

fat frog – thin frog – wet frog

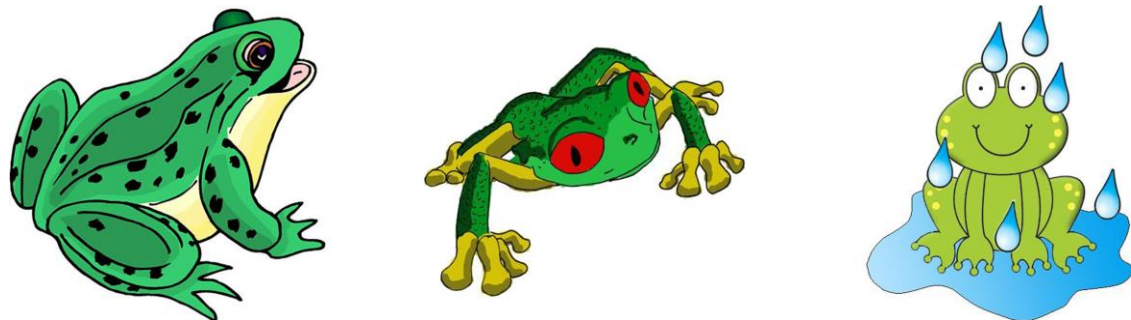

awake cat – asleep cat – tall cat

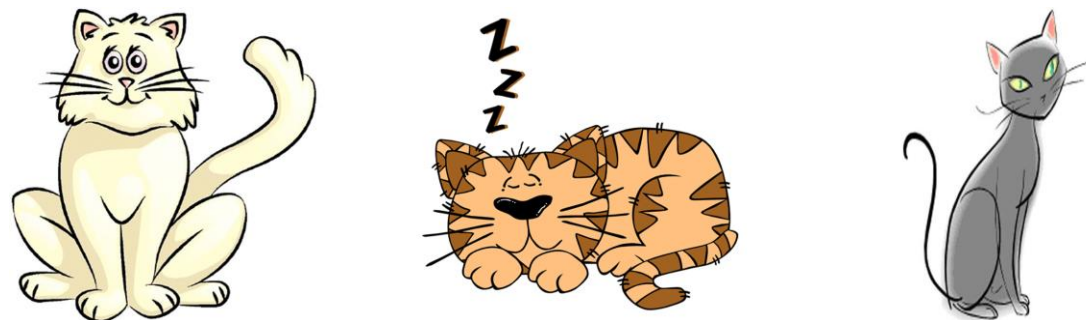

clean pig – dirty pig – small pig

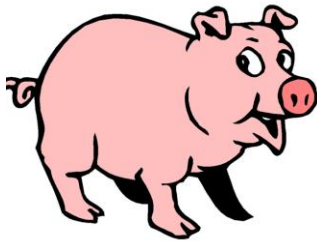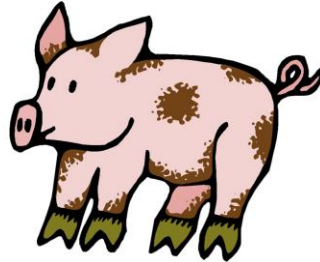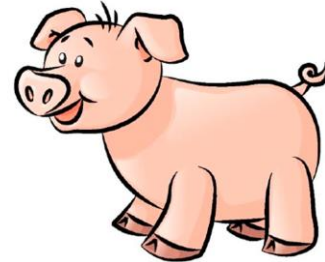

happy monkey – sad monkey – asleep monkey

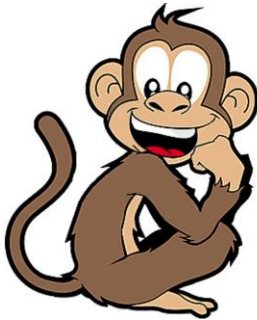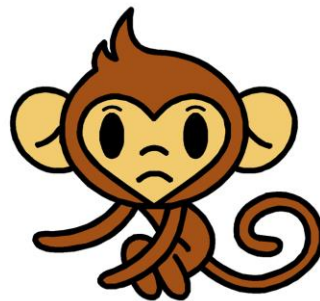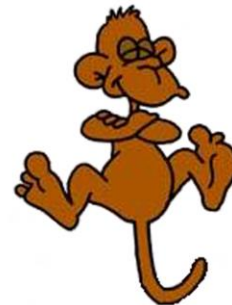

old turtle – young turtle – dirty turtle

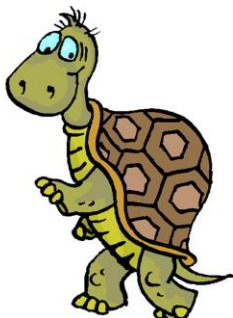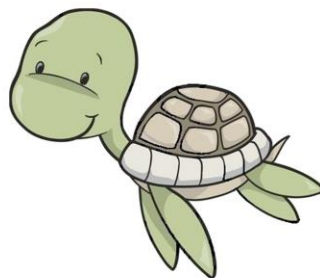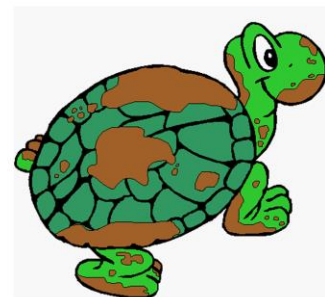

small rabbit – big rabbit – old rabbit

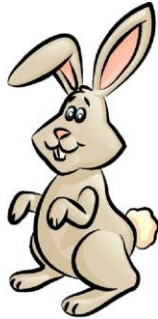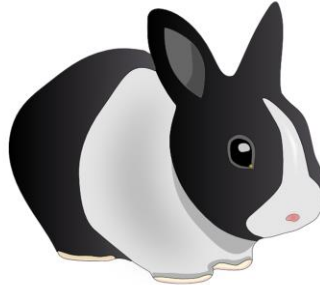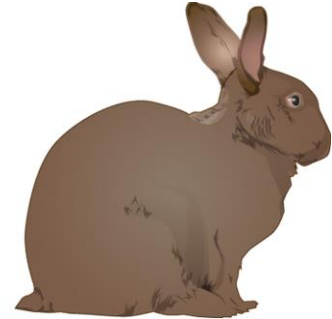

tall dinosaur – short dinosaur – sad dinosaur

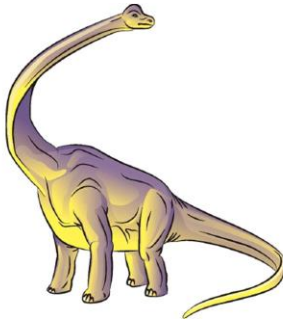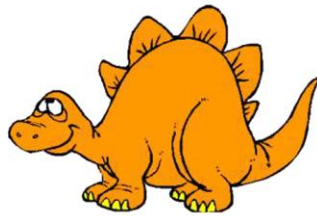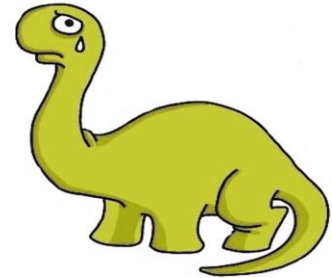

*Note:* Stimuli are not presented to scale. The images measured a maximum of 8 cm on the largest dimension, with the exception of the images depicting *big*, *small*, *tall*, or *short* animals. Images labeled *big* or *tall* measured just under 10 cm on the largest dimension, and images labeled *small* or *short* measured 5 cm on the largest dimension. All images were printed on white paper that was then cut to measure 10 cm x 10 cm so that the image was centered.
